# Supplementary material for: Estimating P- and S-Wave Velocities in Fluid Mud Using Seismic Interferometry
Source: Frontiers journal article supplement (doi:10.3389/feart.2022.806721), 2022-03-03
Supplement: Image_1.pdf [file Image_1.pdf]

# Supplementary Appendix

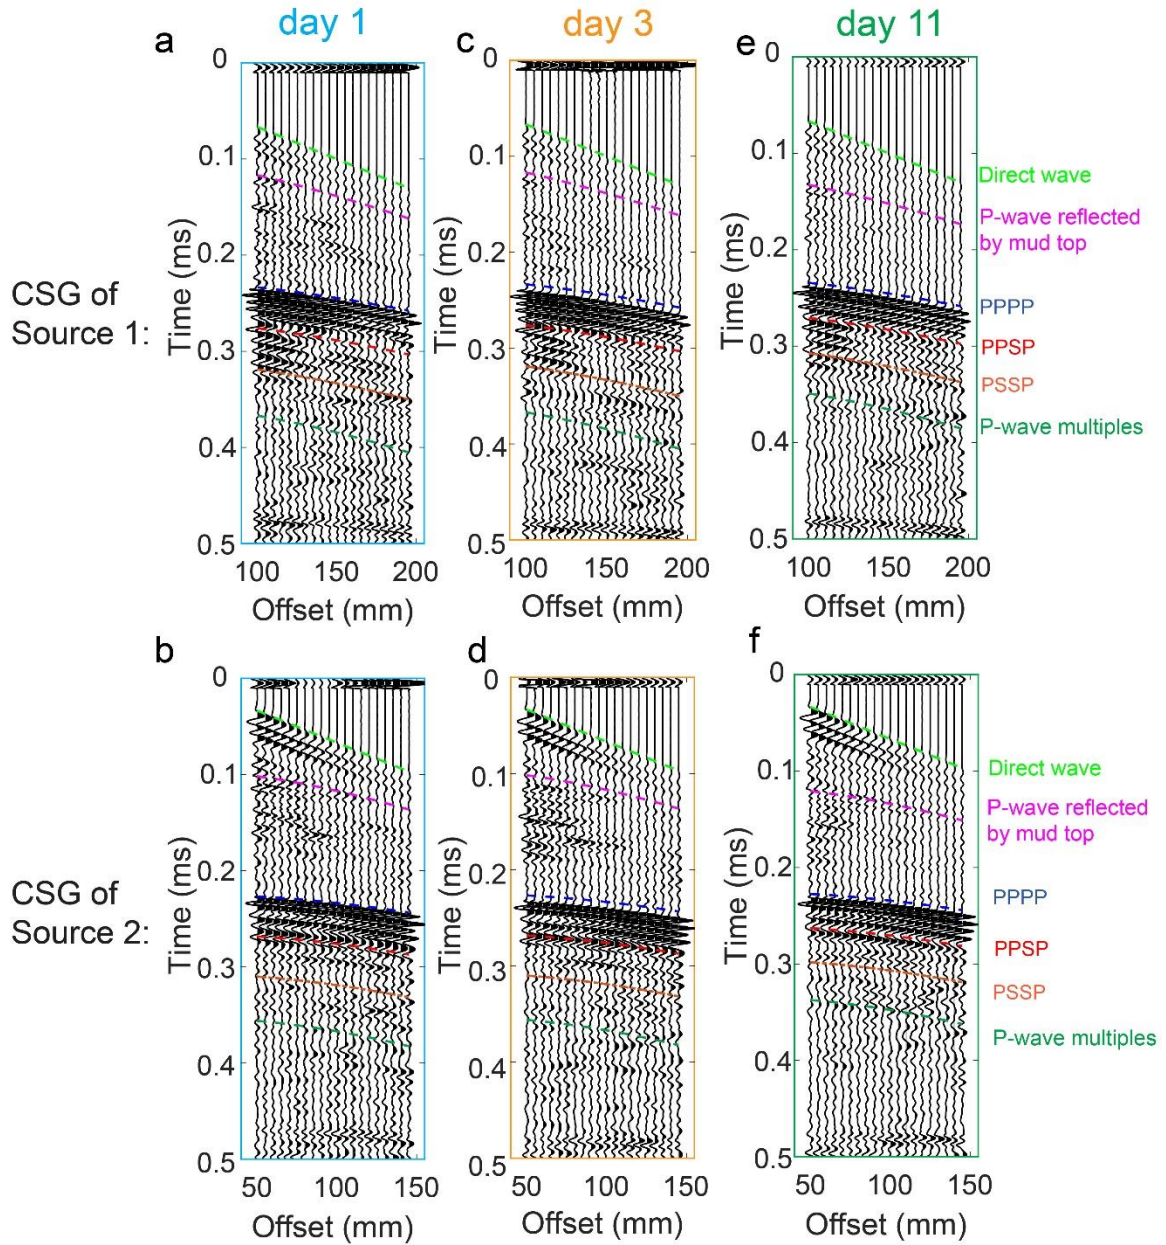

Figure A1 Common-source gathers (CSGs) for Sources (a,c,e) S1 and (b,d,f) S2 for day (a,b) 1, (c,d) 3, (e,f) 11. The CSGs for days 1, 3, 11 are shown in Appendix 1. The color coding indicates different arrivals.

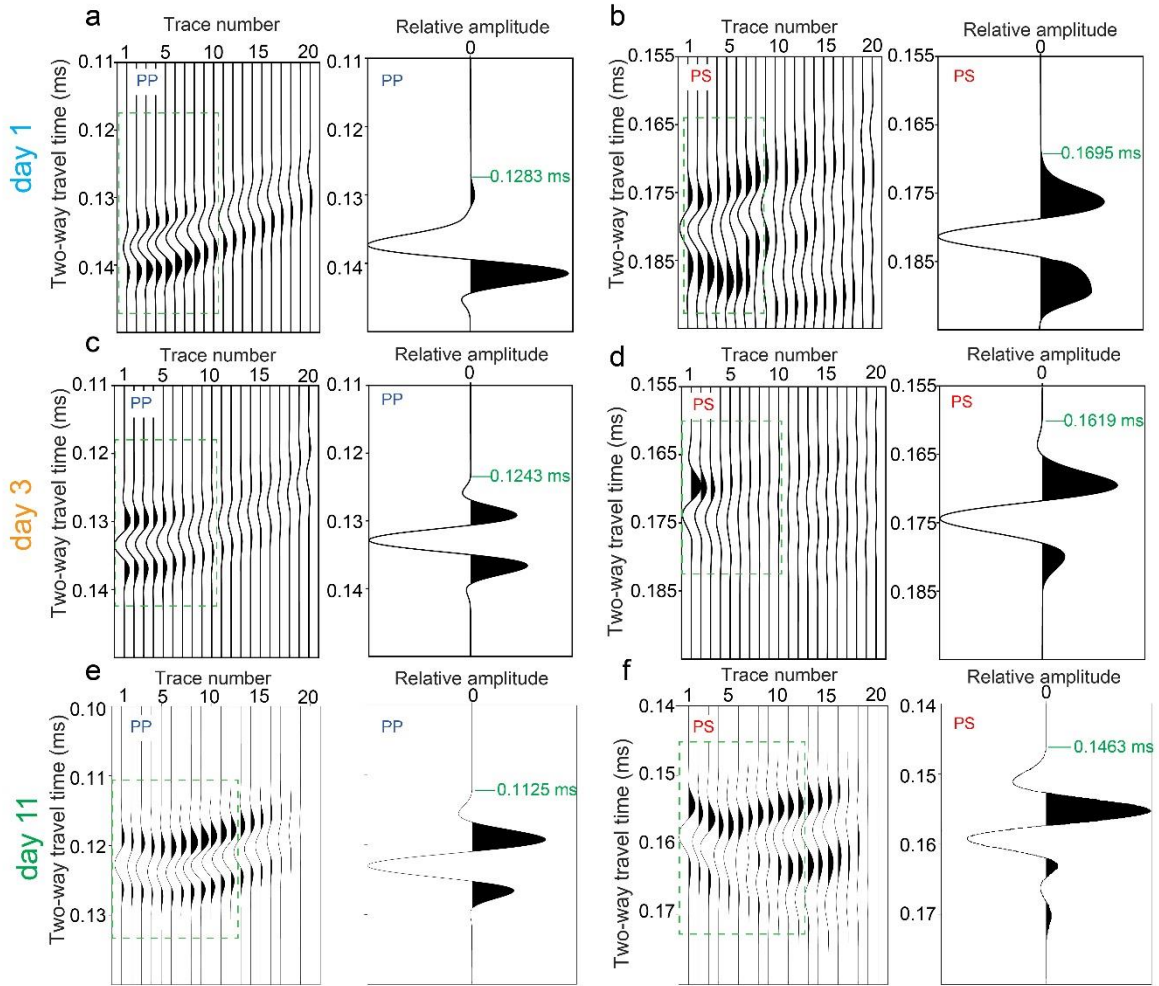

Figure A2 Correlation gathers (left columns) and retrieved ghost reflections (right columns) from inside the fluid-mud layer for (a,b) day 1, (c,d) day 3, and (e,f) day 11. The results in the right columns are obtained by summing the traces inside stationary-phase region (the green rectangles) in the corresponding left columns. (a,c,e) Retrieval of PP ghost reflections. (b,d,f) Retrieval of PS ghost reflections. The green numbers in the right columns indicate the picked arrival times of the retrieved ghost reflections.
